# Supplementary material for: The role of pre-, peri-, and postnatal risk factors in bipolar disorder and adult ADHD
Source: Springer Nature journal article supplement (doi:10.1007/s00702-019-01983-4), 2019-02-13
Supplement: MOESM3 [file 16468962]

Perinatal Questionnaire

*Please answer the following questions about pregnancy:*

1. How old was your mother at your birth? _______
2. Was the pregnancy planned? Yes/No
3. How was the course of pregnancy?

- Normal
- Problematic: Severe nausea

Gestational diabetes

Bleeding

Colds/infections

Premature loss of amniotic fluid

Growth retardation

Other ____________________________

1. How was the psychological condition of your mother during pregnancy?

- Good
- Increased stress:

Occupational stress

Familiar stress, eg illness, fatality

History of ADHD/BD

Medication

Tabaco

Illegal Drugs

Alcohol

Other ___________________________

1. In which relationship were your parents during pregnancy?

______________________________________________________

*Please answer the following questions about the birth itself:*

1. Was your birth at term?

- Yes, it was at term
- No, it was pre-term/ No, it was post-term/needed augmented labor

1. How was the birth itself?

- It corresponded to my mother’s wish of the childbirth
- Spontaneous delivery without any medical intervention
- Spontaneous delivery with anesthesia (PDA)
- Planed C-section because it was your mother’s wish
- Spontaneous delivery with induction of labor
- Spontaneous delivery with complications, used vacuum pump or forceps
- Emergency C-section because of complications

1. Was there any bonding between you and your mother immediately after your birth? Yes/No
2. Did your mother have the impression that medical decisions during labor/during birth were decided in shared decision making with the treating hospital staff? Yes/No

*Please answer the following questions about your early childhood:*

1. How was your relationship to your mother in early childhood?

- Good
- Problematic, because _______________________________

1. How was your relationship to your father in early childhood?

- Good
- Problematic, because _____________________________

1. Have you been a cry baby? Yes/No
2. Have you been breastfed? Yes/No
3. Were there any feeding and/or growth problems?
